# Supplementary material
Source: PubMed Central journal article supplement (PMC6711370)
Supplement: NIHMS1043329-supplement-supplement.pdf [file NIHMS1043329-supplement-supplement.pdf]

## SUPPLEMENTARY MATERIAL

A1. Female/ Control, Left hemisphere

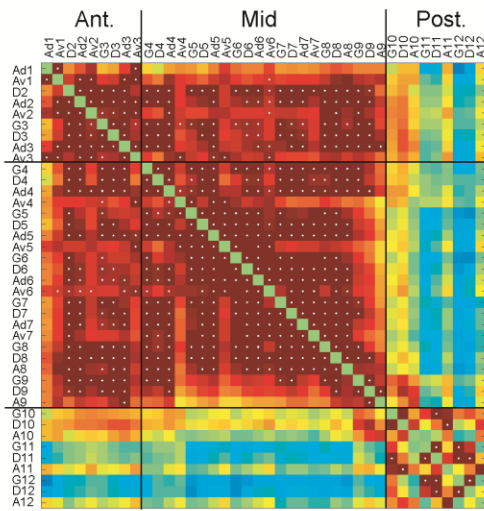

B1. Male/ Control, Left hemisphere

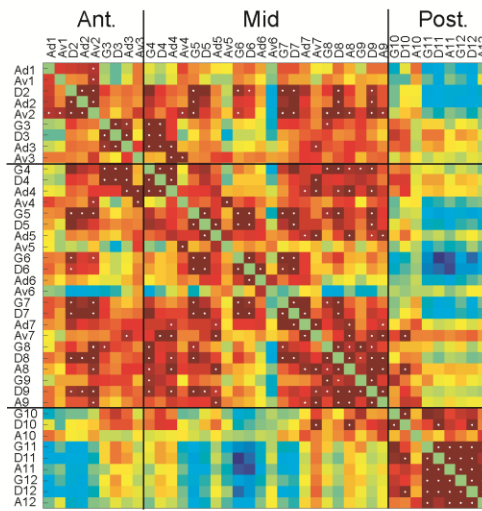

A2. Female/ Control, Right hemisphere

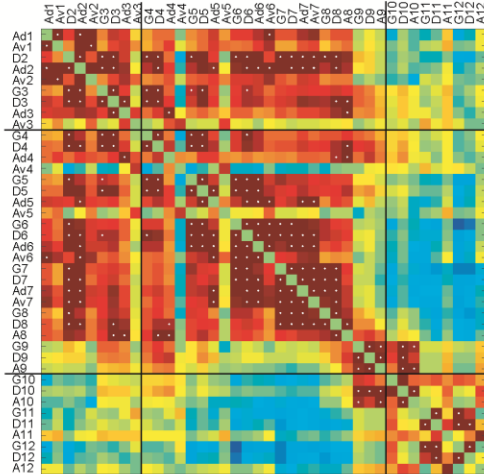

B2. Male/ Control, Right hemisphere

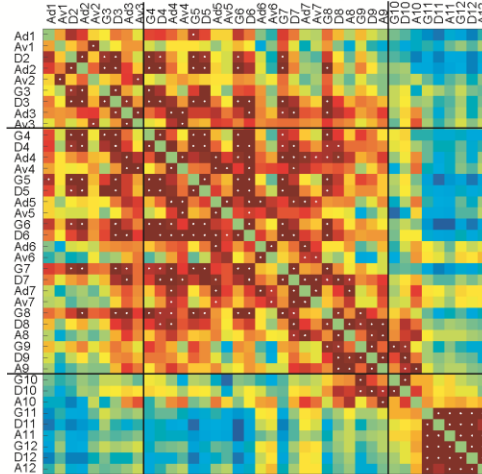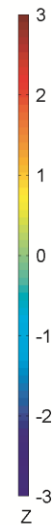

A3. Female/ Control, Left vs. Right

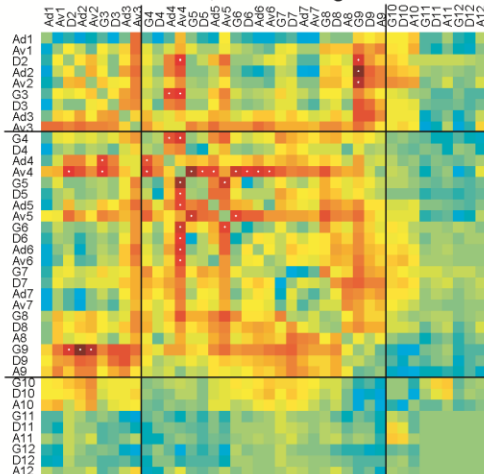

B3. Male/ Control, Left vs. Right

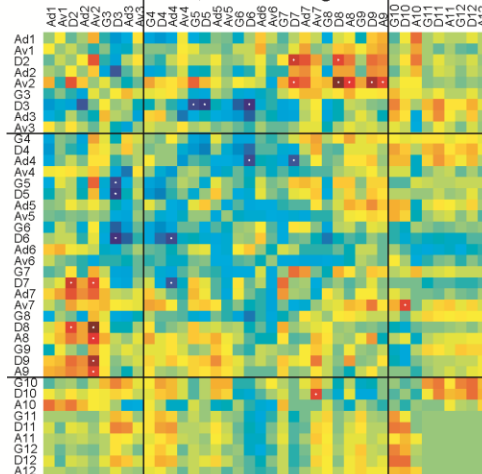

**Figure S1. Comparison of intra-insular functional connectivity between the left and right hemisphere in the control groups.** Inter-regional correlation matrices show qualitatively similar pattern of connectivity across hemisphere in female (A1, A2) and male (B1, B2) control groups. Only a few correlation coefficients show statistically significant differences between the left and right hemisphere (A3, B3, Fisher's Z transform). Statistical significance is marked with white dot ( $P < 0.05$ ).

A1. Female/ Distended, Left hemisphere

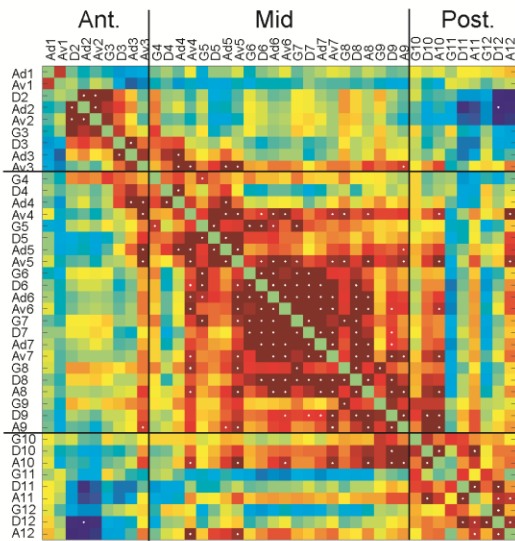

B1. Male/ Distended, Left hemisphere

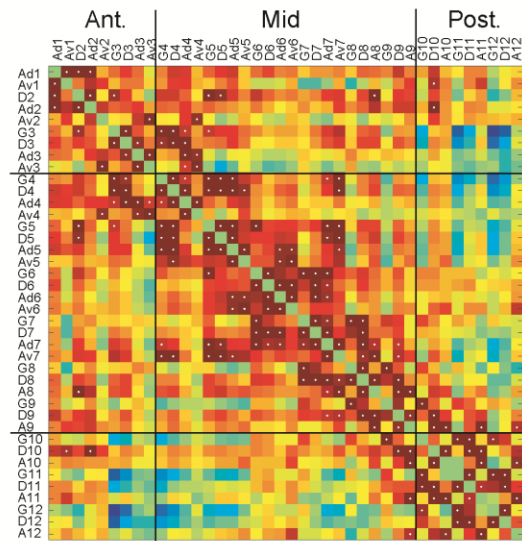

A2. Female/ Distended, Right hemisphere

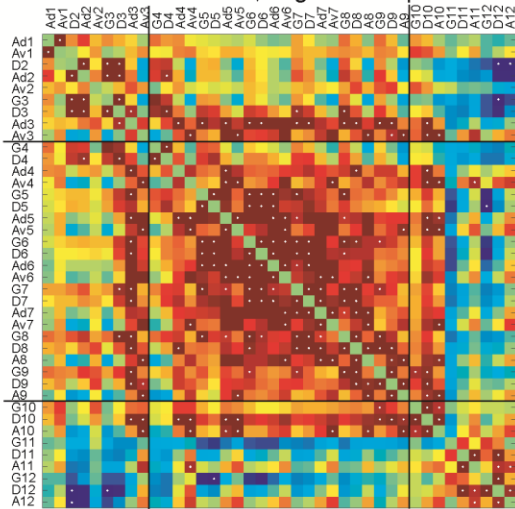

B2. Male/ Distended, Right hemisphere

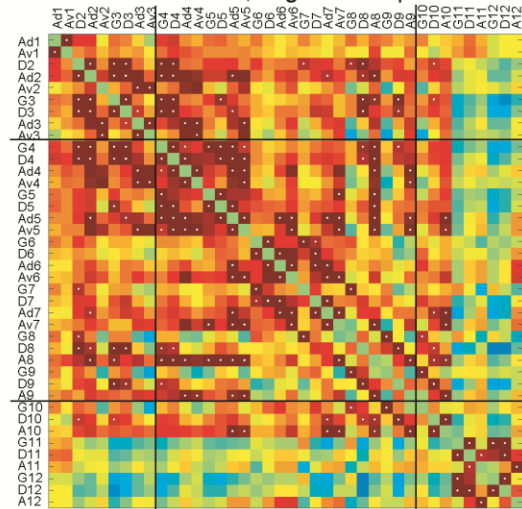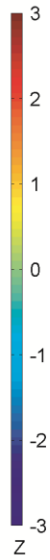

A3. Female/ Distended, Left vs. Right

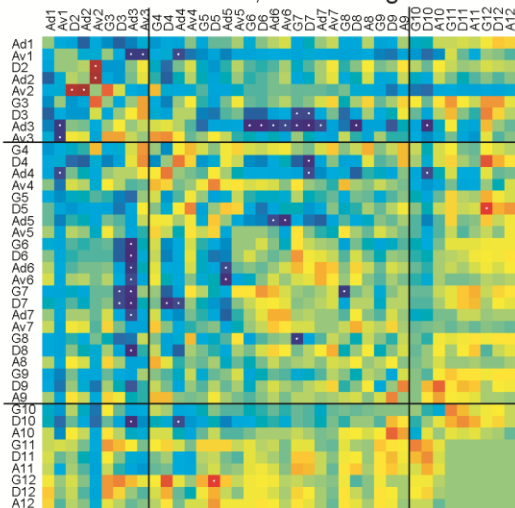

B3. Male/ Distended, Left vs. Right

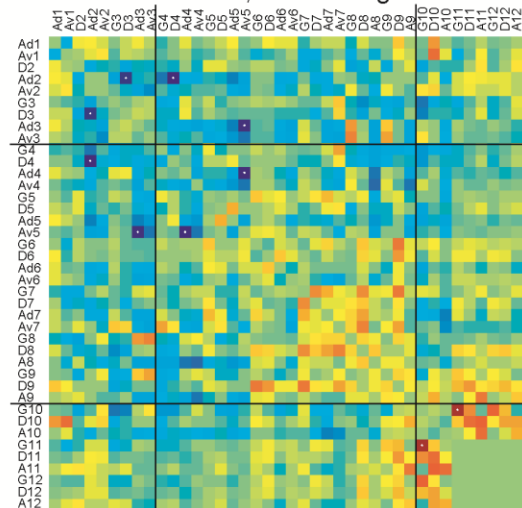

**Figure S2. Comparison of intra-insular functional connectivity between the left and right hemisphere in the distended groups.** Inter-regional correlation matrices show qualitatively similar pattern of connectivity across hemisphere in female (A1, A2) and male (B1, B2) distended groups. Only a few correlation coefficients show statistically significant differences between the left and right hemisphere (A3, B3, Fisher's Z transform). Statistical significance is marked with white dot ( $P < 0.05$ ).

A. Female/Control

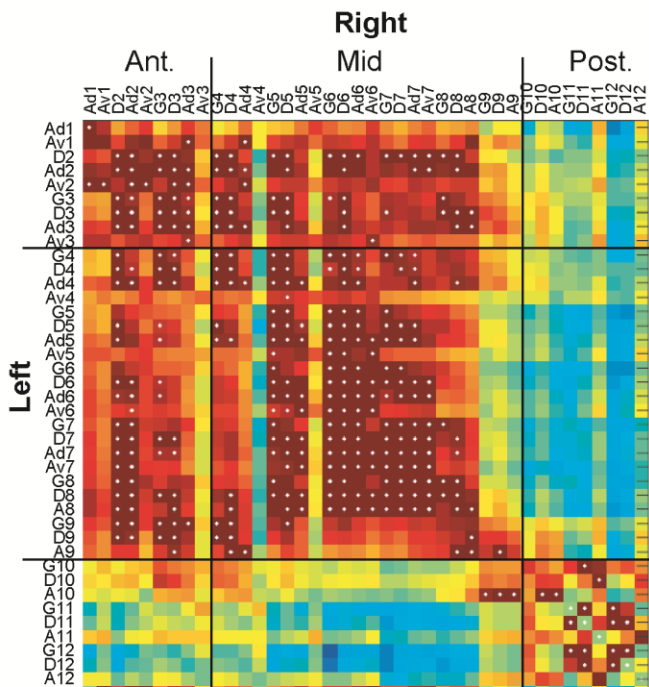

B. Male/Control

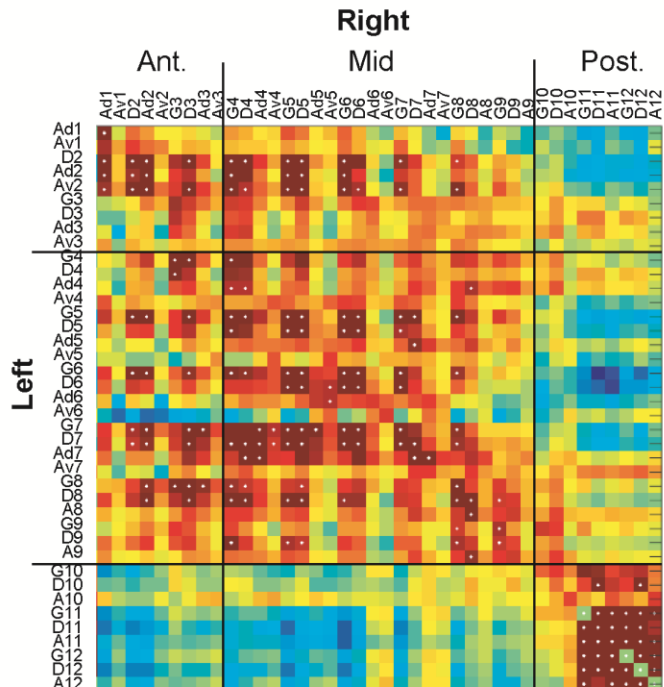

C. Female/Distended

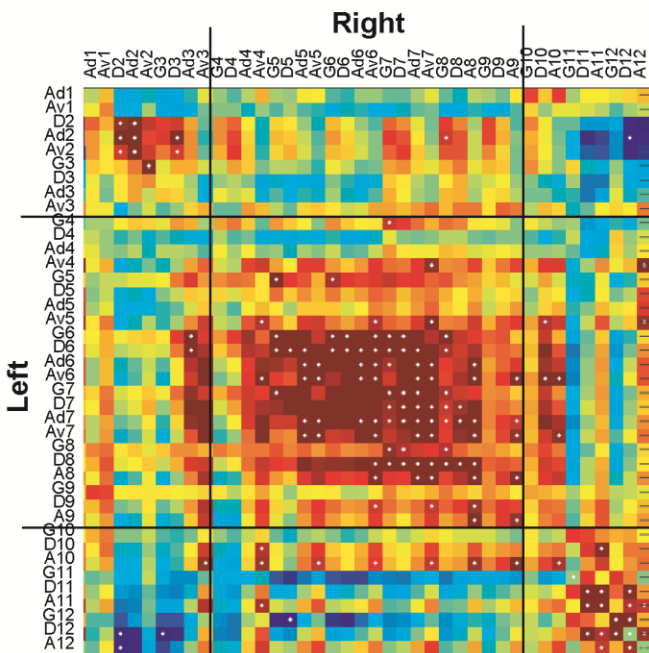

D. Male/Distended

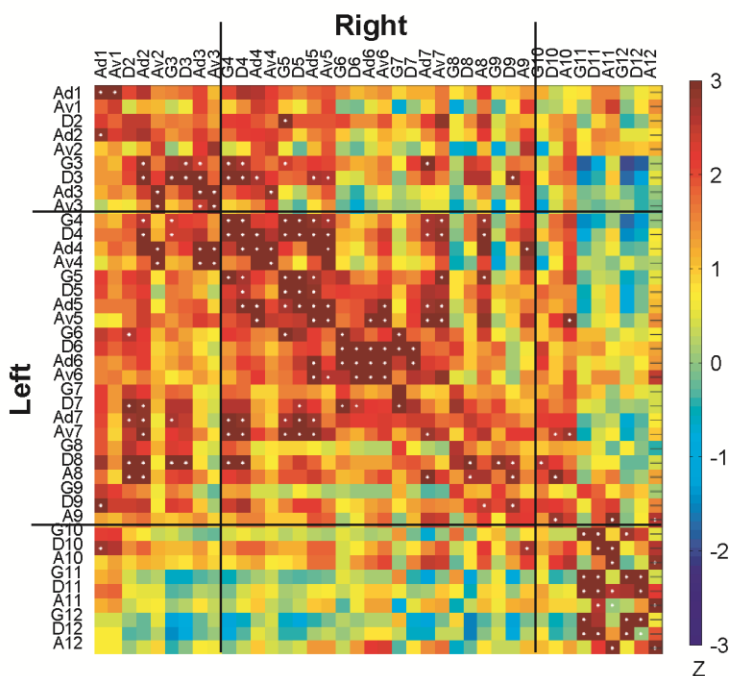

**Figure S3. Cross-hemispheric intra-insular functional connectivity.** Correlation matrices between the left and right insular are color-coded. Statistically significant correlations are marked with white dots. The general pattern of connectivity shows remarkable similarity to that within the left INS across the groups.

A. Female/Control vs. Male/Control

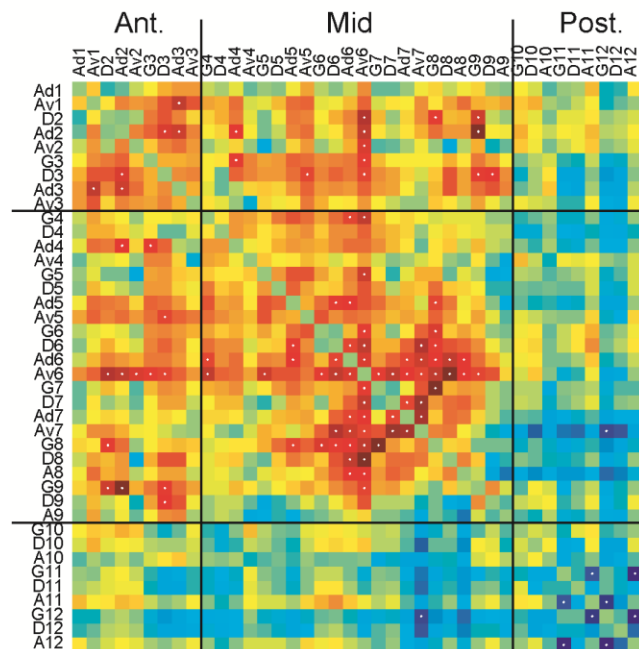

B. Female/Distended vs. Male/Distended

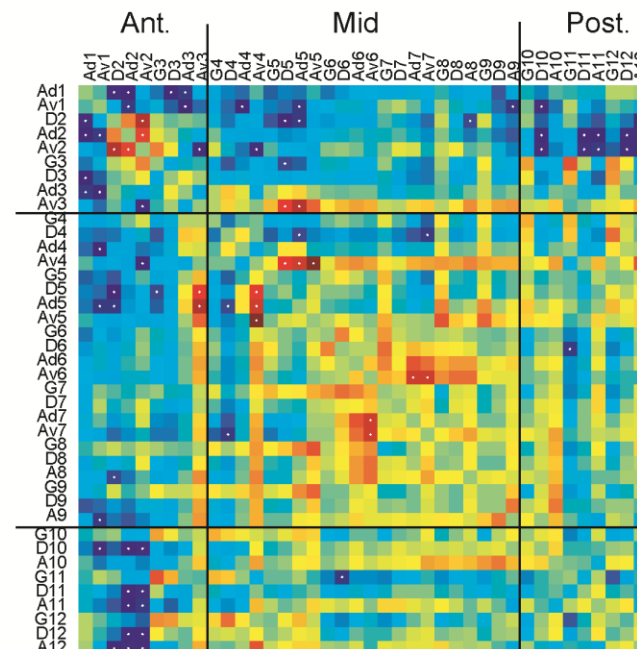

C. Female/Distended vs. Female/Control

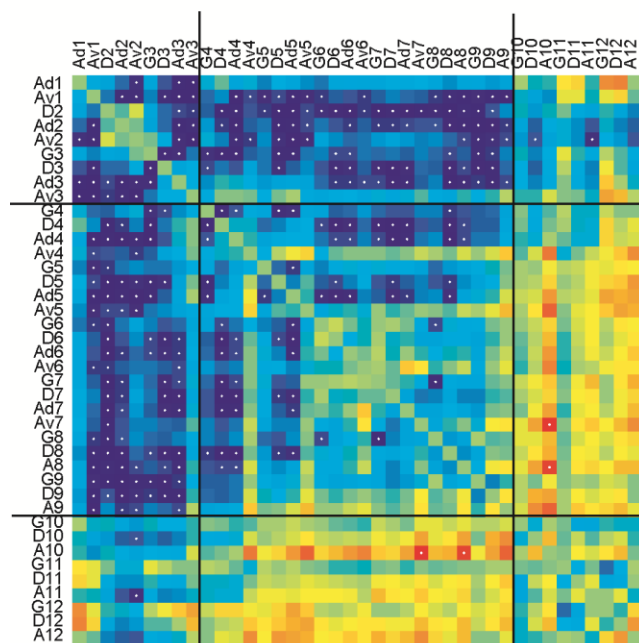

D. Male/Distended vs. Male/Control

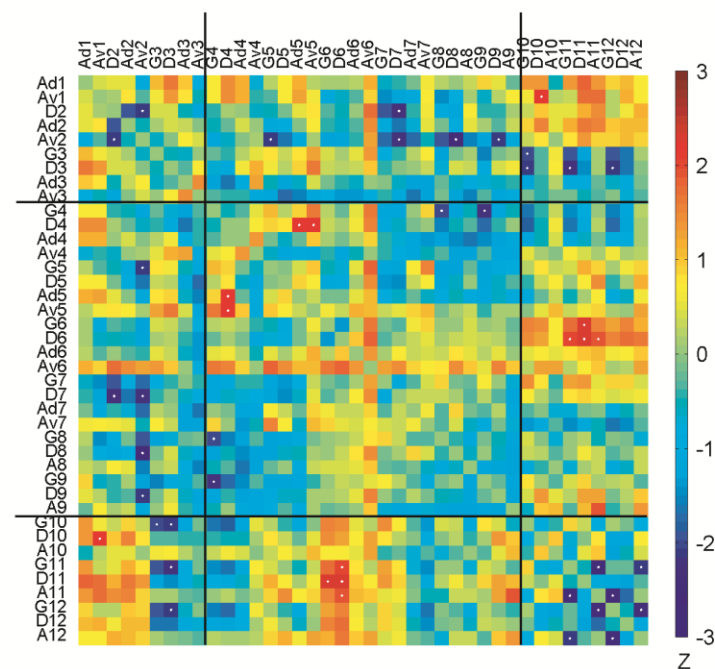

**Figure S4. Comparison of intra-insular functional connectivity.** Statistically significant between-group differences in inter-regional correlation coefficients were tested using Fisher's Z transform and marked with white dots in the correlation matrices. Z value comparing correlation coefficient from the 1st group and 2nd group is color-coded. Greater (smaller) coefficient in the 1st compared to the 2nd group is represented by red (blue) color.

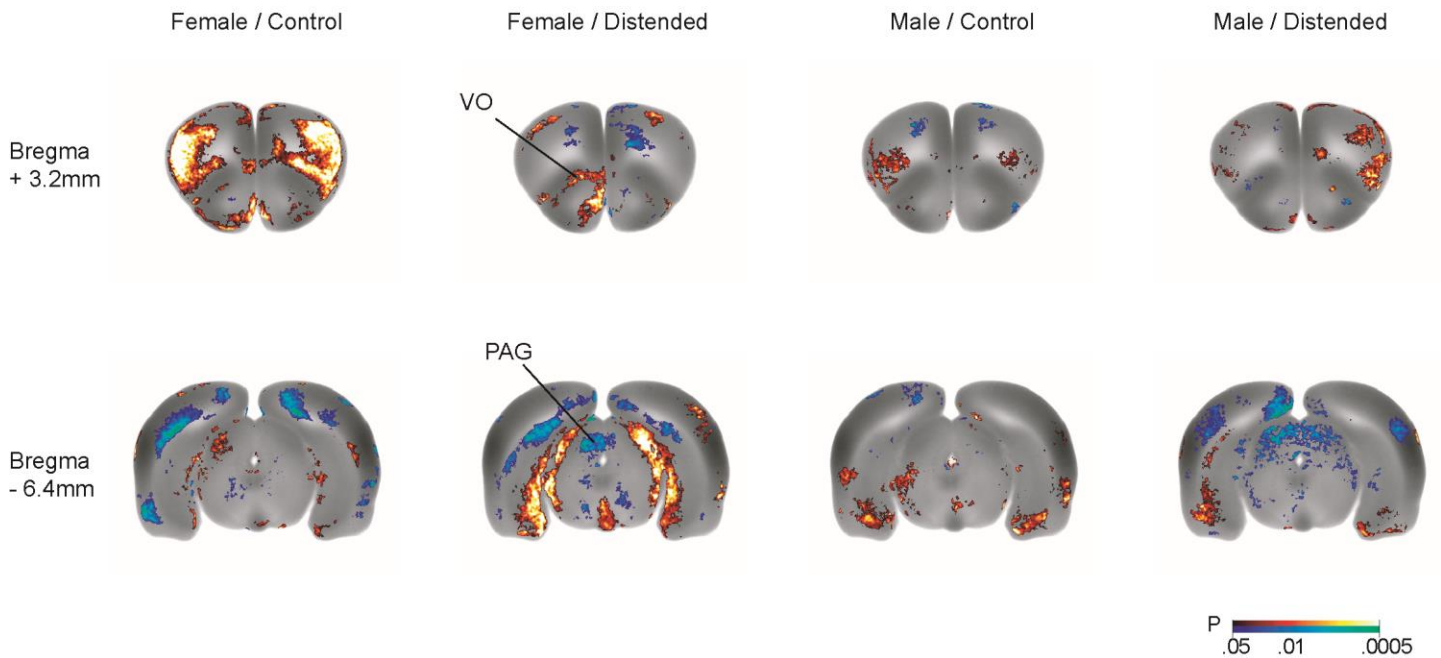

**Figure S5. Specific insular functional connectivity with the ventral orbital cortex in the female/distended group.** Functional connectivity analysis of the INS with pain-related regions revealed strong, positive correlation between the mid INS and VO (ventral orbital cortex) in the female/distended group, but not other groups (**Fig. 6**). We used left Ad7 (dorsal agranular INS at bregma +0.3 mm) as seed, whole-brain functional connectivity was examined for all groups. Representative seed correlation results showed striking sex difference. Color-coded overlays over the template brain at bregma +3.2 mm (top row) and bregma -6.4 mm (lower row) show brain areas that are significantly correlated with the insular seed ( $P < 0.05$  for clusters of  $> 100$  contiguous, significant voxels). Note significant positive correlation in the left VO and negative correlation in the left side of periaqueductal gray (PAG) only in the female/distended group.
